# Supplementary material
Source: publisher figshare collection journal article supplement (https://brill.figshare.com/ndownloader/files/28727916)
Supplement: Supplementary file 1 [file 28727916]

## Sheet: Table S1
species	source	Island_Mainland	svl_max_M	svl_avg_M	sd_M	svl_max_F	svl_avg_F	sd_F	N_males	N_females	N_total	clutch_size	clutch_size_N	size_maturity_F	size_maturity_F_N	data_type
albemarlensis	Carpenter,_1966	Island	x	78.5	x	x	70	x	39	11	50	x	x	x	x	field
albemarlensis	Carpenter,_1966	Island	x	103	x	x	75.5	x	33	6	39	x	x	x	x	field
albemarlensis	Carpenter,_1970	Island	125	x	x	85	x	x	33	6	39	2	3	72	x	field
albemarlensis	Carpenter,_1970	Island	100	x	x	85	x	x	39	11	50	x	x	x	x	field
albemarlensis	Hervias_Parejo_etal_2019	Island	x	85.67	14.83	x	64.26	5.2	13	18	31	x	x	x	x	field
albemarlensis	Hervias_Parejo_etal_2019	Island	x	78.69	9.57	x	61.95	7.83	16	18	34	x	x	x	x	field
albemarlensis	Jordan_etal_2005	Island	x	88.6	x	x	73.1	x	63	50	113	x	x	x	x	field
albemarlensis	Jordan_etal_2005	Island	x	87.8	x	x	72	x	38	37	75	x	x	x	x	field
albemarlensis	Jordan_etal_2005	Island	x	90.9	x	x	74.4	x	59	46	105	x	x	x	x	field
albemarlensis	Meiri_2008	Island	125	x	x	x	x	x	x	x	x	x	x	x	x	compilation
albemarlensis	Meiri_etal_2020	Island	x	x	x	x	x	x	x	x	x	2.25	x	x	x	compilation
albemarlensis	Miles_etal_2001	Island	x	91.4	3.68	x	70.7	3.54	19	9	28	x	x	x	x	field
albemarlensis	Miles_etal_2001	Island	x	87.3	7.71	x	73	4.94	27	17	44	x	x	x	x	field
albemarlensis	own_measurements (Toyama_2017)	Island	91.93	x	x	x	x	x	x	x	24	x	x	x	x	museum
albemarlensis	Vandenburgh_Slevin_1913	Island	x	85	x	x	x	x	1	x	1	x	x	x	x	museum
atacamensis	Escobar-Huerta_2015	Mainland	129.3	103.4	13.6	102.7	88.1	5.7	69	47	116	x	x	x	x	museum_and_field
atacamensis	Meiri_2008	Island	124	x	x	x	x	x	x	x	x	x	x	x	x	compilation
atacamensis	Meiri_etal_2020	Mainland	x	x	x	x	x	x	x	x	x	4.5	x	x	x	compilation
atacamensis	Ortiz_1980	Mainland	122.1	102.7	x	99.3	84.96	x	12	6	18	x	x	x	x	museum
atacamensis	Ortiz_1980	Mainland	118	100.97	x	95.4	83.9	x	19	7	26	x	x	x	x	museum
atacamensis	Ortiz_1980	Mainland	110.5	83.35	x	87.4	83.22	x	4	4	8	x	x	x	x	museum
atacamensis	own_measurements (Toyama_2017)	Mainland	104.57	x	x	x	x	x	x	x	8	x	x	x	x	museum
atacamensis	Torres-Carvajal_2004	Mainland	121	x	x	87	x	x	1	1	2	x	x	x	x	museum
atacamensis	Vidal_&_Ortiz,_2004	Mainland	113.3	x	x	x	x	x	x	x	9	x	x	x	x	museum
atacamensis	Vidal_et_al.,_2002	Mainland	x	114.1	12.9	x	96.06	6.8	25	36	61	x	x	x	x	field
barringtonensis	Carpenter,_1966	Island	x	93.1	x	x	75.7	x	48	31	79	x	x	x	x	field
barringtonensis	Carpenter,_1970	Island	115	x	x	85	x	x	49	31	80	3	1	71	x	field
barringtonensis	Meiri_etal_2020	Island	x	x	x	x	x	x	x	x	x	3	x	x	x	compilation
barringtonensis	Stebbins_etal_1967	Island	99	91	x	80	71	x	9	11	20	x	x	x	x	field
barringtonensis	Vandenburgh_Slevin_1913	Island	x	95	x	x	x	x	1	x	1	x	x	x	x	museum
bivittatus	Arguedas_etal_2018	Island	90	80.6	5.3	71.8	64.7	3.5	25	22	47	x	x	x	x	field
bivittatus	Carpenter,_1966	Island	x	84.6	x	x	62.6	x	27	25	52	x	x	x	x	field
bivittatus	Carpenter,_1970	Island	105	x	x	75	x	x	27	26	53	x	x	61	x	field
bivittatus	Clark_et_al.,_2017	Island	94	71.41	9.78	70	57.85	5.05	161	118	279	x	x	47	118	field
bivittatus	Hervias_Parejo_etal_2019	Island	x	68.61	8.17	x	57.1	5.1	20	15	35	x	x	x	x	field
bivittatus	Meiri_2008	Island	105	x	x	x	x	x	x	x	x	x	x	x	x	compilation
bivittatus	Moore_etal_2017	Island	83	x	x	x	x	x	1	x	1	x	x	x	x	field
bivittatus	own_measurements (Toyama_2017)	Island	79.05	x	x	x	x	x	x	x	7	x	x	x	x	museum
bivittatus	Rowe_etal_2019	Island	88	77.6	3.1	65	60.5	1.2	8	8	16	x	x	x	x	field
bivittatus	Rowe_etal_2020	Island	90	x	x	66	x	x	18	12	30	x	x	x	x	field
bivittatus	Vandenburgh_Slevin_1913	Island	x	79	x	x	x	x	1	x	1	x	x	x	x	museum
delanonis	Carpenter,_1966	Island	x	128.6	x	x	93.7	x	33	31	64	x	x	x	x	field
delanonis	Carpenter,_1970	Island	150	x	x	110	x	x	41	43	84	2.6	7	x	x	field
delanonis	Hervias_Parejo_etal_2019	Island	x	119.7	7.06	x	83.61	7.67	15	15	30	x	x	x	x	field
delanonis	Jordan_and_Snell_2002	Island	x	x	x	111.3	98.4	x	x	50	x	4.1	325	83.9	33	field
delanonis	Meiri_2008	Island	155	x	x	x	x	x	x	x	x	x	x	x	x	compilation
delanonis	Meiri_etal_2020	Island	x	x	x	x	x	x	x	x	x	3.47	x	x	x	compilation
delanonis	own_measurements (Toyama_2017)	Island	133.8	x	x	x	x	x	x	x	14	x	x	x	x	museum
delanonis	Vandenburgh_Slevin_1913	Island	x	137	x	x	x	x	1	x	1	x	x	x	x	museum
delanonis	Werner_1978	Island	133	x	x	104	x	x	93	102	195	4.36	33	x	x	field
duncanensis	Carpenter,_1966	Island	x	85	x	x	75.5	x	20	23	43	x	x	x	x	field
duncanensis	Carpenter,_1970	Island	105	x	x	85	x	x	17	32	49	x	x	x	x	field
duncanensis	Hervias_Parejo_etal_2019	Island	x	85.96	4.29	x	71.02	4.04	15	15	30	x	x	x	x	field
duncanensis	Meiri_2008	Island	100	x	x	x	x	x	x	x	x	x	x	x	x	compilation
duncanensis	own_measurements (Toyama_2017)	Island	86.99	x	x	x	x	x	x	x	4	x	x	x	x	museum
duncanensis	Vandenburgh_Slevin_1913	Island	x	95	x	x	x	x	1	x	1	x	x	x	x	museum
grayii	Carpenter,_1966	Island	x	68.5	x	x	72.7	x	42	17	59	x	x	x	x	field
grayii	Carpenter,_1970	Island	95	x	x	85	x	x	42	17	59	x	x	x	x	field
grayii	Clark_et_al.,_2015	Island	x	89.43	1.98	x	70.82	1.63	21	17	38	x	x	x	x	field
grayii	Hervias_Parejo_etal_2019	Island	x	88.02	9.16	x	70.37	4.19	16	13	29	x	x	x	x	field
grayii	Meiri_2008	Island	110	x	x	x	x	x	x	x	x	x	x	x	x	compilation
grayii	own_measurements (Toyama_2017)	Island	107.99	x	x	x	x	x	x	x	3	x	x	x	x	museum
grayii	Vandenburgh_Slevin_1913	Island	x	65	x	x	x	x	1	x	1	x	x	x	x	museum
habelii	Carpenter,_1966	Island	x	102.7	x	x	83.7	x	18	27	45	x	x	x	x	field
habelii	Carpenter,_1970	Island	115	x	x	90	x	x	23	27	50	2.5	2	76	x	field
habelii	Hervias_Parejo_etal_2019	Island	x	90.87	9.7	x	75.17	4.33	15	15	30	x	x	x	x	field
habelii	Meiri_2008	Island	115	x	x	x	x	x	x	x	x	x	x	x	x	compilation
habelii	Meiri_etal_2020	Island	x	x	x	x	x	x	x	x	x	2.5	x	x	x	compilation
habelii	own_measurements (Toyama_2017)	Island	98.91	x	x	x	x	x	x	x	6	x	x	x	x	museum
habelii	Vandenburgh_Slevin_1913	Island	x	111	x	x	x	x	1	x	1	x	x	x	x	museum
heterolepis	Escobar-Huerta_2015	Mainland	118.7	100.9	13.2	84.4	82.8	1.4	4	x	4	x	x	x	x	museum_and_field
heterolepis	Meiri_2008	Mainland	130	x	x	x	x	x	x	x	x	x	x	x	x	compilation
heterolepis	Meiri_etal_2020	Mainland	x	x	x	x	x	x	x	x	x	4	x	x	x	compilation
heterolepis	Vidal_etal_2017	Mainland	118.7	x	x	x	x	x	x	x	4	x	x	x	x	museum
indefatigabilis	Carpenter,_1966	Island	x	80.3	x	x	64.1	x	65	118	183	x	x	x	x	field
indefatigabilis	Carpenter,_1970	Island	95	x	x	75	x	x	67	118	185	2.3	3	60	x	field
indefatigabilis	Clark_et_al.,_2015	Island	x	70	1.18	x	59.23	1.27	56	31	87	x	x	x	x	field
indefatigabilis	Hervias_Parejo_etal_2019	Island	x	76.26	8.04	x	63.23	3.65	27	24	51	x	x	x	x	field
indefatigabilis	Jordan_etal_2008	Island	98	91	3.8	x	x	x	58	x	58	x	x	x	x	field
indefatigabilis	Jordan_etal_2008	Island	93	87.8	3.7	x	x	x	38	x	38	x	x	x	x	field
indefatigabilis	Jordan_etal_2008	Island	98	88.6	4.2	x	x	x	56	x	56	x	x	x	x	field
indefatigabilis	Meiri_etal_2020	Island	x	x	x	x	x	x	x	x	x	2.33	x	x	x	compilation
indefatigabilis	Rowe_etal_2019	Island	80	75.9	1.9	65	61.3	0.9	8	8	16	x	x	x	x	field
indefatigabilis	Stebbins_etal_1967	Island	90	81	x	73	68	x	17	23	40	2.3	22	57	62	field
indefatigabilis	Stebbins_etal_1967	Island	87	77	x	72	63	x	21	61	82	x	x	x	x	field
jacobii	Carpenter,_1966	Island	x	82.2	x	x	70.7	x	17	6	23	x	x	x	x	field
jacobii	Carpenter,_1966	Island	x	72.2	x	x	65.8	x	29	17	46	x	x	x	x	field
jacobii	Carpenter,_1970	Island	100	x	x	80	x	x	17	6	23	x	x	x	x	field
jacobii	Carpenter,_1970	Island	100	x	x	80	x	x	29	17	46	2	5	59	x	field
jacobii	Hervias_Parejo_etal_2019	Island	x	80.13	8.99	x	63.62	2.07	16	13	29	x	x	x	x	field
jacobii	Meiri_etal_2020	Island	x	x	x	x	x	x	x	x	x	2	x	x	x	compilation
koepckeorum	Dixon_&_Wright,_1975	Mainland	81	x	x	68	x	x	x	x	x	3	x	50	x	field
koepckeorum	Goldberg_2008	Mainland	78	67.6	6.8	67	55.7	4.1	21	21	42	3.2	13	50	13	museum
koepckeorum	Meiri_2008	Mainland	81	x	x	x	x	x	x	x	x	x	x	x	x	compilation
koepckeorum	Meiri_etal_2020	Mainland	x	x	x	x	x	x	x	x	x	3.1	x	x	x	compilation
koepckeorum	own_measurements (Toyama_2017)	Mainland	79.02	x	x	x	x	x	x	x	1	x	x	x	x	museum
koepckeorum	Pérez_personal_comm	Mainland	77.9	68.64	8.38	72.8	61.56	6.48	9	5	17	x	x	x	x	field
occipitalis	Clark_et_al.,_2015	Mainland	x	63.84	1.49	x	54.88	0.74	32	26	58	x	x	x	x	field
occipitalis	Dixon_&_Wright,_1975	Mainland	75	64.4	x	58	52.2	x	x	x	x	3.5	x	47	x	field
occipitalis	Goldberg_2008	Mainland	79	62.8	11.9	65	51.5	5.1	28	33	61	4.5	9	44	9	museum
occipitalis	GuzmanCaldas_2016	Mainland	x	60.4	8.01	x	51.68	5.78	56	31	87	x	x	x	x	field
occipitalis	Meiri_2008	Mainland	80	x	x	x	x	x	x	x	x	x	x	x	x	compilation
occipitalis	Meiri_etal_2020	Mainland	x	x	x	x	x	x	x	x	x	4	x	x	x	compilation
occipitalis	own_measurements (Toyama_2017)	Mainland	74.28	x	x	x	x	x	x	x	25	x	x	x	x	museum
occipitalis	own_measurements (Toyama_etal_2019)	Mainland	69.8	50.24	9.94	55.04	43.21	7.17	69	70	139	x	x	x	x	field
occipitalis	Rowe_etal_2019	Mainland	72	67.6	2.5	64	58.3	3.5	5	3	8	x	x	x	x	field
occipitalis	Torres-Carvajal_2004	Mainland	75	x	x	62	x	x	1	1	2	x	x	x	x	museum
occipitalis	Watkins,_1996	Mainland	72	63	15.7	60	55.1	7.5	74	89	163	x	x	x	x	field
pacificus	Carpenter,_1966	Island	x	83.5	x	x	75.9	x	17	32	49	x	x	x	x	field
pacificus	Carpenter,_1970	Island	100	x	x	90	x	x	17	32	49	3	1	76	x	field
pacificus	Hervias_Parejo_etal_2019	Island	x	94.28	4.62	x	78.1	5.68	12	16	28	x	x	x	x	field
pacificus	Meiri_2008	Island	105	x	x	x	x	x	x	x	x	x	x	x	x	compilation
pacificus	Meiri_etal_2020	Island	x	x	x	x	x	x	x	x	x	3	x	x	x	compilation
pacificus	own_measurements (Toyama_2017)	Island	85.68	x	x	x	x	x	x	x	4	x	x	x	x	museum
pacificus	Vandenburgh_Slevin_1913	Island	x	100	x	x	x	x	1	x	1	x	x	x	x	museum
peruvianus	Dixon_&_Wright,_1975	Mainland	116	x	x	93	x	x	x	x	x	x	x	x	x	museum
peruvianus	Dixon_&_Wright,_1975	Mainland	103	98.3	x	97	84.6	x	x	x	x	3.5	x	78	x	field
peruvianus	Dixon_&_Wright,_1975	Mainland	98	96.3	x	78	75.2	x	x	x	x	4.1	x	68	x	field
peruvianus	Dixon_&_Wright,_1975	Mainland	72	62.3	x	64	57.1	x	x	x	x	2.3	x	50	x	field
peruvianus	Goldberg_2008	Mainland	109	86.8	18.8	93	73	12.6	17	25	42	3.5	13	56	13	museum
peruvianus	Meiri_2008	Mainland	140	x	x	x	x	x	x	x	x	x	x	x	x	compilation
peruvianus	Meiri_etal_2020	Mainland	x	x	x	x	x	x	x	x	x	3.5	x	x	x	compilation
peruvianus	own_measurements (Toyama_2017)	Mainland	104.78	x	x	x	x	x	x	x	20	x	x	x	x	museum
peruvianus	own_measurements (Toyama_etal_2018)	Mainland	110.7	x	x	x	x	x	x	x	x	x	x	x	x	museum
peruvianus	Péfaur_&_López-Tejada,_1983	Mainland	x	x	x	x	x	x	5	6	33	4.8	11	x	x	field
peruvianus	Ramírez_Peralta_2017	Mainland	x	x	x	x	x	x	x	x	x	4.24	34	x	x	field
peruvianus	Torres-Carvajal_2004	Mainland	115	x	x	70	x	x	2	1	3	x	x	x	x	museum
quadrivittatus	Escobar-Huerta_2015	Mainland	129.3	104.4	13.2	116.5	93.7	9.7	31	27	58	x	x	x	x	museum_and_field
quadrivittatus	Goldberg_Rodriguez_1986	Mainland	x	102.3	x	90	78.5	x	x	25	25	3.6	25	67	25	field
quadrivittatus	Meiri_2008	Mainland	124.8	x	x	x	x	x	x	x	x	x	x	x	x	compilation
quadrivittatus	Meiri_etal_2020	Mainland	x	x	x	x	x	x	x	x	x	3.16	x	x	x	compilation
quadrivittatus	Pérez_&_Balta_2004	Mainland	146	x	x	x	x	x	1	x	1	x	x	x	x	field
quadrivittatus	Vidal_&_Ortiz,_2004	Mainland	112	x	x	x	x	x	x	x	10	x	x	x	x	museum
stolzmanni	Beuttner_&_Koch,_2019	Mainland	138	97.2	18.2	100	65.1	10.3	24	14	38	x	x	52	24	field
stolzmanni	Dixon_&_Wright,_1975	Mainland	123	107.1	x	81	63.5	x	x	x	x	3.5	x	49	x	field
stolzmanni	Dixon_&_Wright,_1975	Mainland	106	80.3	x	68	57.4	x	x	x	x	x	x	48	x	field
stolzmanni	Goldberg_2008	Mainland	120	88.2	17.4	73	62.1	5.3	19	18	37	2.6	17	53	17	museum
stolzmanni	Meiri_2008	Mainland	123	x	x	x	x	x	x	x	x	x	x	x	x	compilation
stolzmanni	Meiri_etal_2020	Mainland	x	x	x	x	x	x	x	x	x	2.6	x	x	x	compilation
stolzmanni	own_measurements (Toyama_2017)	Mainland	106.2	x	x	x	x	x	x	x	21	x	x	x	x	museum
stolzmanni	Torres-Carvajal_2004	Mainland	95	x	x	63	x	x	2	1	3	x	x	x	x	museum
tarapacensis	Escobar-Huerta_2015	Mainland	x	x	x	84.4	x	x	x	3	3	x	x	x	x	museum
tarapacensis	Meiri_2008	Mainland	110.4	x	x	x	x	x	x	x	x	x	x	x	x	compilation
tarapacensis	Meiri_etal_2020	Mainland	x	x	x	x	x	x	x	x	x	4.5	x	x	x	compilation
theresiae	Dixon_&_Wright,_1975	Mainland	x	x	x	62	x	x	x	13	13	x	x	x	x	field
theresiae	Dixon_&_Wright,_1975	Mainland	69	x	x	66	x	x	1	1	2	2.8	4	55	10	museum
theresiae	Goldberg_2008	Mainland	72	68	3.9	67	59.8	3.6	6	17	23	3.4	10	58	10	museum
theresiae	Meiri_2008	Mainland	107	x	x	x	x	x	x	x	x	x	x	x	x	compilation
theresiae	Meiri_etal_2020	Mainland	x	x	x	x	x	x	x	x	x	3.4	x	x	x	compilation
theresiae	own_measurements (Toyama_2017)	Mainland	59.21	x	x	x	x	x	x	x	4	x	x	x	x	museum
theresiae	Torres-Carvajal_2004	Mainland	107	x	x	80	x	x	1	1	2	x	x	x	x	museum
theresioides	Bonacic_etal_2016	Mainland	117	x	x	x	x	x	x	x	17	x	x	x	x	field
theresioides	Chester_2010	Mainland	120	x	x	x	x	x	x	x	x	x	x	x	x	undefined
theresioides	Escobar-Huerta_2015	Mainland	113.1	99.5	7.5	110.1	90.3	6.7	29	17	46	x	x	x	x	museum_and_field
theresioides	Goldberg_Rodriguez_1986	Mainland	x	78.3	x	92	71	x	x	24	24	2.8	24	58	24	field
theresioides	Meiri_2008	Mainland	114.7	x	x	x	x	x	x	x	x	x	x	x	x	compilation
theresioides	Meiri_etal_2020	Mainland	x	x	x	x	x	x	x	x	x	2.8	x	x	x	compilation
theresioides	own_measurements (Toyama_2017)	Mainland	113.13	x	x	x	x	x	x	x	6	x	x	x	x	museum
thoracicus	Dixon_&_Wright,_1975	Mainland	94	85.6	x	76	74.2	x	5	5	10	3.1	40	70	x	field
thoracicus	Dixon_&_Wright,_1975	Mainland	84	81.6	x	70	63.4	x	5	5	10	x	x	60	x	field
thoracicus	Dixon_&_Wright,_1975	Mainland	74	70.6	x	56	51.8	x	5	5	10	x	x	48	x	field
thoracicus	Dixon_&_Wright,_1975	Mainland	68	65.8	x	62	55.4	x	5	5	10	x	x	52	x	field
thoracicus	Dixon_&_Wright,_1975	Mainland	67	65.2	x	59	56.8	x	5	5	10	x	x	54	x	field
thoracicus	Goldberg_2008	Mainland	77	63.2	7.8	64	53.9	4.3	23	19	42	2.5	15	46	15	museum
thoracicus	Meiri_2008	Mainland	94	x	x	x	x	x	x	x	x	x	x	x	x	compilation
thoracicus	Meiri_etal_2020	Mainland	x	x	x	x	x	x	x	x	x	2.8	x	x	x	compilation
thoracicus	own_measurements (Toyama_2017)	Mainland	67.82	x	x	x	x	x	x	x	3	x	x	x	x	museum
thoracicus	own_measurements (Toyama_etal_2018)	Mainland	86.8	74.59	7.66	75.5	64.09	6.06	26	29	55	x	x	x	x	field
thoracicus	Torres-Carvajal_2004	Mainland	82	x	x	x	x	x	1	x	1	x	x	x	x	museum
tigris	Dixon_&_Wright,_1975	Mainland	105	70.6	x	72	61.5	x	x	x	68	3.8	x	49	68	field
tigris	Goldberg_2008	Mainland	80	61.9	13.8	67	55	8.5	16	5	21	3	2	56	2	museum
tigris	Meiri_2008	Mainland	105	x	x	x	x	x	x	x	x	x	x	x	x	compilation
tigris	Meiri_etal_2020	Mainland	x	x	x	x	x	x	x	x	x	3.4	x	x	x	compilation
tigris	own_measurements (Toyama_2017)	Mainland	75.82	x	x	x	x	x	x	x	5	x	x	x	x	museum
tigris	Ruiz_etal_2017	Mainland	x	80.1	x	x	65.4	x	17	13	30	x	x	x	x	field
yanezi	Escobar-Huerta_2015	Mainland	109	90.6	7.8	90.3	86.4	3.4	11	3	14	x	x	x	x	museum_and_field
yanezi	Meiri_2008	Mainland	73.65	x	x	x	x	x	x	x	x	x	x	x	x	compilation
yanezi	Vidal_etal_2017	Mainland	109	x	x	x	x	x	x	x	14	x	x	x	x	museum
